# Supplementary material for: Targeted Metabolomic and Transcriptomic Analyses of “Red Russian” Kale (Brassicae napus var. pabularia) Following Methyl Jasmonate Treatment and Larval Infestation by the Cabbage Looper (Trichoplusia ni Hübner)
Source: PubMed Central journal article supplement (PMC5979517; doi:10.3390/ijms19041058), 2018-04-02

**Targeted Metabolome and Transcriptome Analyses of “Red Russian” Kale  
(*Brassica napus* var. *pabularia* Following Methyl Jasmonate Treatment and  
Larval Infestation by the Cabbage Looper (*Trichoplusia ni* Hübner)**

Yu-Chun Chiu<sup>1</sup>, John A. Juvik<sup>2</sup>, Kang-Mo Ku<sup>1\*</sup>

<sup>1</sup> Division of Plant and Soil Sciences, West Virginia University, Morgantown, WV 26506, USA;  
yuchiu@mix.wvu.edu (Y.-C.C.); kangmo.ku@mail.wvu.mail (K.-M.K.)

<sup>2</sup> Department of Crop Sciences, University of Illinois at Urbana-Champaign, Urbana, IL 61801, USA;  
juvik@illinois.edu (J.A.J.)

**Supplementary Table S1.** Glucosinolate profile of different maturity (different leaf location) of 'Red Russian' kale. Stages were separated by the different position on the plant from apical to basal leaf.

| Stage | Glucoiberin  | Glucoerucin  | GR          | Gluconapin  | Progoitrin   | Sinigrin    | GBS         | NeoGBS      | 4MGBS       | 4OHGBS      | GNS         |
|-------|--------------|--------------|-------------|-------------|--------------|-------------|-------------|-------------|-------------|-------------|-------------|
| 1     | 0.42±0.25 ab | 1.94±0.44 a  | 7.59±1.38 a | 1.40±0.52 a | 47.09±9.94 a | 0.37±0.14 a | 8.39±3.89 a | 6.79±2.33 a | 0.19±0.08 a | 1.52±0.46 a | 1.15±0.27 a |
| 2     | 0.42±0.05 a  | 0.67±0.19 b  | 5.61±0.96 b | 1.51±0.76 a | 24.04±8.15 b | 0.16±0.05 b | 3.37±1.16 b | 1.74±0.61 b | 0.06±0.02 b | 0.46±0.08 b | 0.86±0.10 a |
| 3     | 0.28±0.17 ab | 0.44±0.25 c  | 1.84±1.59 c | 1.42±0.05 a | 6.19±2.18 c  | 0.00±0.00 c | 0.73±0.44 c | 0.70±0.20 b | 0.03±0.01 b | 0.39±0.23 b | 0.64±0.40 b |
| 4     | 0.11±0.05 b  | 0.37±0.14 bc | 0.25±0.15 c | 0.51±0.13 b | 1.91±0.43 c  | 0.00±0.00 c | 0.17±0.13 c | 0.25±0.09 b | 0.00±0.00 b | 0.34±0.12 b | 0.38±0.20 b |
| 5     | 0.35±0.21 ab | 0.17±0.09 c  | 0.13±0.07 c | 0.22±0.11 b | 1.01±0.70 c  | 0.00±0.00 c | 0.42±0.23 c | 0.62±0.22 b | 0.01±0.01 b | 0.15±0.08 b | 0.19±0.13 b |

<sup>z</sup> Values are means of four replications. Kale leaves were harvested at five different positions (stage 1: youngest, stage 2, stage 3, stage 4, and stage 5: oldest) from the same plant to different five maturation stages<sup>z</sup>. Abbreviation: GR = glucoraphanin, GBS = glucobrassicin, NeoGBS = neoglucobrassicin, 4MGRN = 4-methoxyglucobrassicin, 4OHBRN = 4-OH-glucobrassicin, GNS = gluconasturtiin.

**Supplementary Table S2.** Tentative identification of desulfo-glucosinolate in “Red Russian” kale by LC- high resolution MS in the full scan positive and negative ion mode.

| $t_R$ (min) | Trivial name             | Type of side chain        | DS <sup>z</sup> molecular formula                               | Measured MW <sup>z</sup> <sub>DS</sub> | $\Delta$ ppm | MS fragment ion (positive ionization) | MS fragment ion (negative ionization) |
|-------------|--------------------------|---------------------------|-----------------------------------------------------------------|----------------------------------------|--------------|---------------------------------------|---------------------------------------|
| 7.55        | Glucoraphanin            | 4-methylsulfinylbutyl     | C <sub>12</sub> H <sub>23</sub> NO <sub>7</sub> S <sub>2</sub>  | 358.0982                               | -1.927       | 196.02                                | 194.92                                |
| 10.03       | Gluconapin               | 3-butenyl                 | C <sub>11</sub> H <sub>19</sub> NO <sub>6</sub> S               | 294.1001                               | -1.341       | 132.05                                | 130.03                                |
| 7.35        | Progoitrin               | (2R)-2-hydroxy-3-butenyl  | C <sub>11</sub> H <sub>19</sub> NO <sub>7</sub> S               | 310.0948                               | -2.287       | 148.04                                | 146.03                                |
| 15.14       | Glucobrassicin           | 3-indolylmethyl           | C <sub>16</sub> H <sub>20</sub> N <sub>2</sub> O <sub>6</sub> S | 369.1108                               | -1.743       | 207.06                                | 205.04                                |
| 19.54       | Neoglucobrassicin        | N-methoxy-3-indolylmethyl | C <sub>17</sub> H <sub>22</sub> N <sub>2</sub> O <sub>7</sub> S | 399.1217                               | -0.872       | 237.07                                | 235.05                                |
| 19.49       | 4-methoxy-glucobrassicin | 4-methoxy-3-indolylmethyl | C <sub>17</sub> H <sub>22</sub> N <sub>2</sub> O <sub>7</sub> S | 399.1214                               | -1.624       | 237.07                                | 235.06                                |
| 10.76       | 1-hydroxy-glucobrassicin | 1-hydroxy-3-indolylmethyl | C <sub>16</sub> H <sub>20</sub> N <sub>2</sub> O <sub>7</sub> S | 385.1059                               | -1.371       | 223.05                                | 221.04                                |

<sup>z</sup>DS indicates desulfo-glucosinolate.

**Supplementary Table S3.** Primer set information for gene expression analysis

| Gene class                  | Gene name      | Gene model  | Type                  | Sequence                  |
|-----------------------------|----------------|-------------|-----------------------|---------------------------|
| Chain elongation            | <i>MAM3</i>    | Bol004799   | Forward               | GGTGGATGAAGAAACAGGTTACG   |
|                             |                |             | Reverse               | CAAACCGCCTCGATGTCTCT      |
|                             | <i>SUR1</i>    | Bol029775   | Forward               | GCTCCCACGTCCCGTTT         |
|                             |                |             | Reverse               | GCGAACCTCGAGACCACTGT      |
| Core-structure biosynthesis | <i>SOT17</i>   | Bol030757   | Forward               | CCATCGCCACGCTTCCT         |
|                             |                |             | Reverse               | CCGCCGTACTCGACGAAA        |
|                             | <i>SOT18</i>   | Bol026202v2 | Forward               | CCCAAAGACAGGCACCACTT      |
|                             |                |             | Reverse               | GGAATCGTCGAAGCGAGATC      |
|                             | <i>CYP79B2</i> | Bol032767   | Forward               | GATGAAATTAACCCACCATTAAGGA |
|                             |                |             | Reverse               | GCCATGGCCCATTCGA          |
|                             | <i>SOT16</i>   | Bol039395   | Forward               | TTCGACGACGCCACGAA         |
|                             |                |             | Reverse               | CTCCACGTAAGGCACGAACTC     |
| Secondary modification      | <i>GSL-OH</i>  | Bol033373   | Forward               | GCTTGTTGATGCTCTGTCATTGT   |
|                             |                |             | Reverse               | TGGCGCCGAGCGTTAG          |
|                             | <i>CYP81F1</i> | Bol028913   | Forward               | CCGAGACATTCCGGCTATTC      |
|                             |                |             | Reverse               | CATGTCCTCCGTCGGTCTTC      |
|                             | <i>CYP81F2</i> | Bol026044   | Forward               | TCTCCCACCAGGACCAACTC      |
|                             |                |             | Reverse               | GGTGGACCGGCGGTTT          |
|                             | <i>CYP81F3</i> | Bol028919   | Forward               | CTCCTCACTCGAACAGAATGT     |
|                             |                |             | Reverse               | GGAAACAAGGGCGGTTTGAT      |
| <i>CYP81F4</i>              | Bol032712v2    | Forward     | TCCCTCTCCGCCTCACTCT   |                           |
|                             |                | Reverse     | GGTGGACGGGAGGTTTAATGA |                           |
| Transcription factors       | <i>MYB28</i>   | Bol036286   | Forward               | TCTGAGCAGATTCTCAATGAAGATG |
|                             |                |             | Reverse               | TCAGGGTAAAACGTTGTTTGA     |
|                             | <i>MYB29</i>   | Bol008849   | Forward               | GCTTCCATGGGCAATATCATATC   |
|                             |                |             | Reverse               | GACATGGAGGAGACAGTGTGTAGA  |
|                             | <i>MYB34</i>   | Bol007760   | Forward               | GCTCAAACCGGTGGCAAA        |
|                             |                |             | Reverse               | CGTCAAGATCATCGGAGAAAGA    |
|                             | <i>MYB122</i>  | BoMYB122    | Forward               | CTTCCCGACAAAGCTGGACT      |
|                             |                |             | Reverse               | TTGGCTAAACTCACCACGCT      |
| Myrosinase                  | <i>TGG1</i>    | Bol017328v2 | Forward               | GTGCCTACGAGAGGCTATTCAAC   |
|                             |                |             | Reverse               | GCCGTAACATCTTTCATCAACCT   |
|                             | <i>TGG2</i>    | Bol028319v2 | Forward               | CGAACTCAACGCTACTGGTTACA   |

|                         |              |             |         |                          |
|-------------------------|--------------|-------------|---------|--------------------------|
| Specifier proteins      | <i>ESP</i>   | Bol006378   | Reverse | TACTCCCCTGCTCCTCTTTCC    |
|                         |              |             | Forward | CTACACGACTGCTACCGTCTATGG |
|                         | <i>ESM1</i>  | Bol005067v2 | Reverse | GGTTGTTGGTGGGACGTTTT     |
|                         |              |             | Forward | TCCGATGTTGAACCAGTTTGC    |
| Endogenous control gene | <i>Actin</i> | Bol030974   | Reverse | CGAAGGATGGCGTTGTAGAAA    |
|                         |              |             | Forward | TCCCGAGAGGAAGTACAGTGTCT  |
|                         |              |             | Reverse | GAGATCCACATCTGCTGGAATG   |

---

**Supplementary Table S4.** Primary metabolites identified from “Red Russian” kale by GC-MS analysis.

| Tentative Metabolites | Rt (min) <sup>z</sup> | Characteristic ion ( <i>m/z</i> )           | TMS <sup>y</sup>         | VIP  | ID <sup>x</sup>        |
|-----------------------|-----------------------|---------------------------------------------|--------------------------|------|------------------------|
| Glucose               | 12.52                 | <b>73</b> <sup>w</sup> , 147, 160, 205, 319 | Meox, (TMS) <sub>5</sub> | 12.5 | STD/ NIST <sup>v</sup> |
| Galactose             | 11.64                 | <b>73</b> , 147, 205, 217, 319              | Meox, (TMS) <sub>5</sub> | 7.5  | STD/ NIST              |
| Sucrose               | 16.90                 | 73, 147, 217, 271, <b>361</b>               | (TMS) <sub>8</sub>       | 6.3  | STD/ NIST              |
| Fructose              | 12.30                 | <b>73</b> , 130, 147, 217, 307              | Meox, (TMS) <sub>5</sub> | 2.8  | STD/ NIST              |
| Alanine               | 5.65                  | 73, <b>116</b> , 147                        | (TMS) <sub>2</sub>       | 1.4  | STD/ NIST              |

<sup>z</sup>Retention time.

<sup>y</sup>Meox, methyloxime; TMS, trimethylsilyl.

<sup>x</sup>Identification.

<sup>w</sup>Highest peak is label as bold

<sup>v</sup>Metabolites were identified using commercial standard compounds (STD) in comparison with the mass spectra in The National Institute of Standards and Technology (NIST) and retention time.

**Supplemental Figure S1.** Representative image of insect damaged kale seedlings.

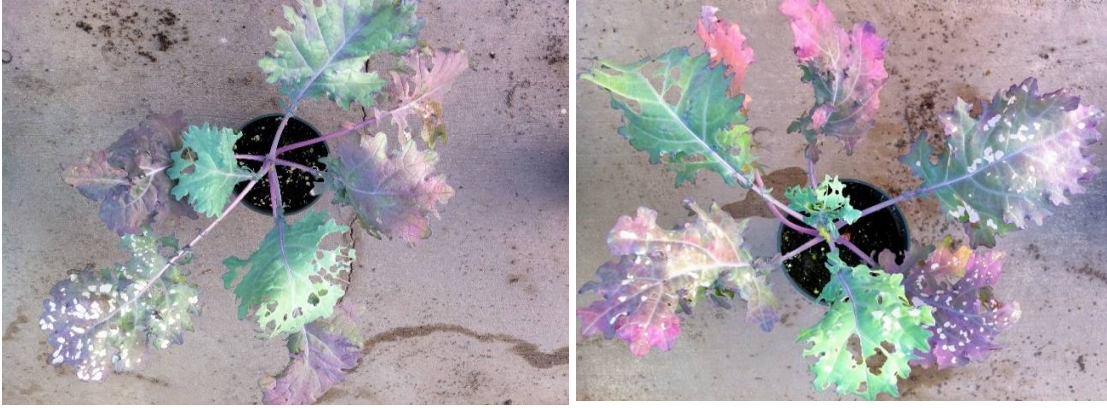

**Supplemental Figure S2.** Representative image of different leaf location (maturation stage) in kale seedling. (Stage 1: youngest – Stage 5: oldest).

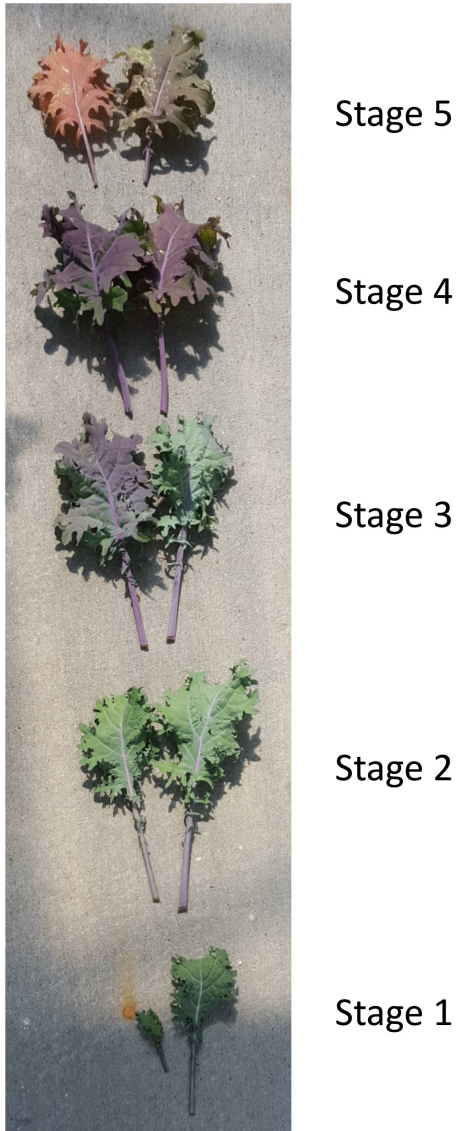

Supplement: ijms-19-01058-s001.pdf [file ijms-19-01058-s001.pdf]
